# Supplementary material
Source: bioRxiv or medRxiv preprint supplement (https://www.biorxiv.org/highwire/filestream/121164/field_highwire_adjunct_files/5/392373-6.pdf)

Table S15A. Soluble Proteins Determined by SignalP4.1/Kyte-Doolittle/Phobius

| Protein | SignalP 4.1 (Default optimized D-cutoff value)                                                                                                                                                                                                                              | Kyte Doolittle (window size = 19)                                                                                                                           | Phobius                                                                                                                                                                                                                                                                         |
|---------|-----------------------------------------------------------------------------------------------------------------------------------------------------------------------------------------------------------------------------------------------------------------------------|-------------------------------------------------------------------------------------------------------------------------------------------------------------|---------------------------------------------------------------------------------------------------------------------------------------------------------------------------------------------------------------------------------------------------------------------------------|
| AWA1    | <p>SignalP-4.1 prediction (euk networks) sp_Q8TGE1_AWA1_YEASK</p> 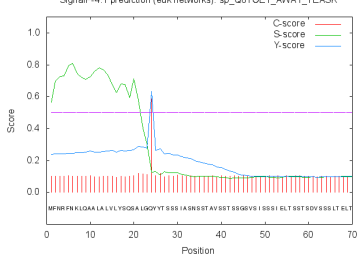 <p>Score</p> <p>Position</p> <p>MFIPKFKIGDAIA LVLVYRGA LGOVYI SRSIA SRSSTAV SST SSGVYS I SRSI ELT SST SDV SRSI ELT</p>  | <p>ProtScale output for user_sequence</p>  <p>Score</p> <p>Position</p>   | <p>Phobius posterior probabilities for sp(Q8TGE1)AWA1_YEASK</p>  <p>Posterior label probability</p> <p>Position</p> <p>transmembrane cytoplasmic non-cytoplasmic signal peptide</p>          |
| MEL1    | <p>SignalP-4.1 prediction (euk networks) tr_A0A18YFB2_A0A18YFB2_SACUV</p>  <p>Score</p> <p>Position</p> <p>MFLLYL FSSFRAYSGH LGSF PYSYNGLGLT PGMQWDIMT FACDVSGL LDTADR ISG IGLKDLGYIYV</p> | <p>ProtScale output for user_sequence</p>  <p>Score</p> <p>Position</p>   | <p>Phobius posterior probabilities for tr(A0A18YFB2)A0A18YFB2_SACUV</p>  <p>Posterior label probability</p> <p>Position</p> <p>transmembrane cytoplasmic non-cytoplasmic signal peptide</p> |
| MEL2    | <p>SignalP-4.1 prediction (euk networks) sp_P41945_MEL2_YEASK</p>  <p>Score</p> <p>Position</p> <p>MFAFYFLTACTILKGF PYSYPSYNGLGLT PGMQWDIMT FACDVSGL LDTADR ISG IGLKDLGYIYV</p>          | <p>ProtScale output for user_sequence</p>  <p>Score</p> <p>Position</p> | <p>Phobius posterior probabilities for sp(P41945)MEL2_YEASK</p>  <p>Posterior label probability</p> <p>Position</p> <p>transmembrane cytoplasmic non-cytoplasmic signal peptide</p>        |
| MEL5    | <p>SignalP-4.1 prediction (euk networks) sp_P41946_MEL5_YEASK</p>  <p>Score</p> <p>Position</p> <p>MFAFYFLTACTILKGF PYSYPSYNGLGLT PGMQWDIMT FACDVSGL LDTADR ISG IGLKDLGYIYV</p>          | <p>ProtScale output for user_sequence</p>  <p>Score</p> <p>Position</p> | <p>Phobius posterior probabilities for sp(P41946)MEL5_YEASK</p>  <p>Posterior label probability</p> <p>Position</p> <p>transmembrane cytoplasmic non-cytoplasmic signal peptide</p>        |

Table S15A. Soluble Proteins Determined by SignalP4.1/Kyte-Doolittle/Phobius

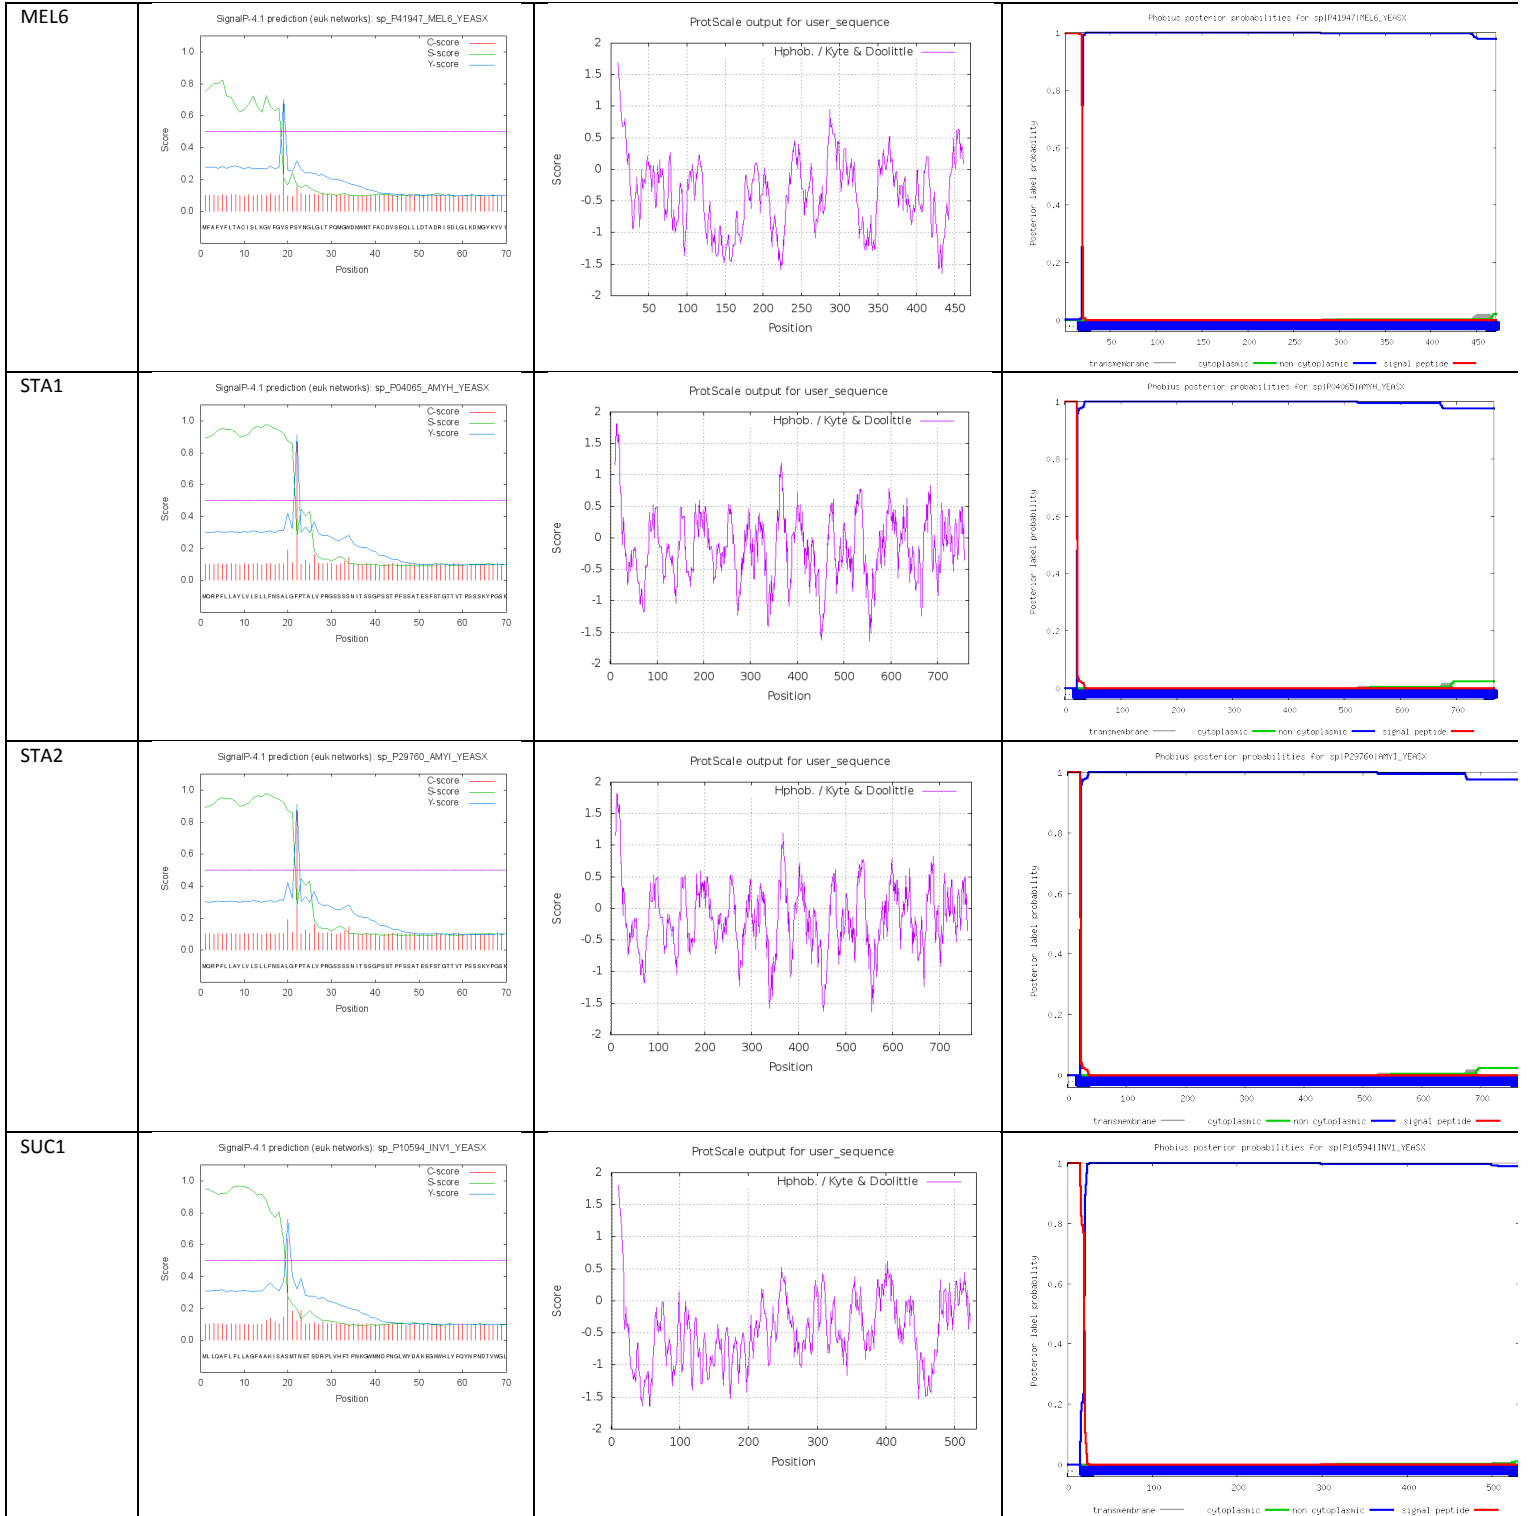

Table S15A. Soluble Proteins Determined by SignalP4.1/Kyte-Doolittle/Phobius

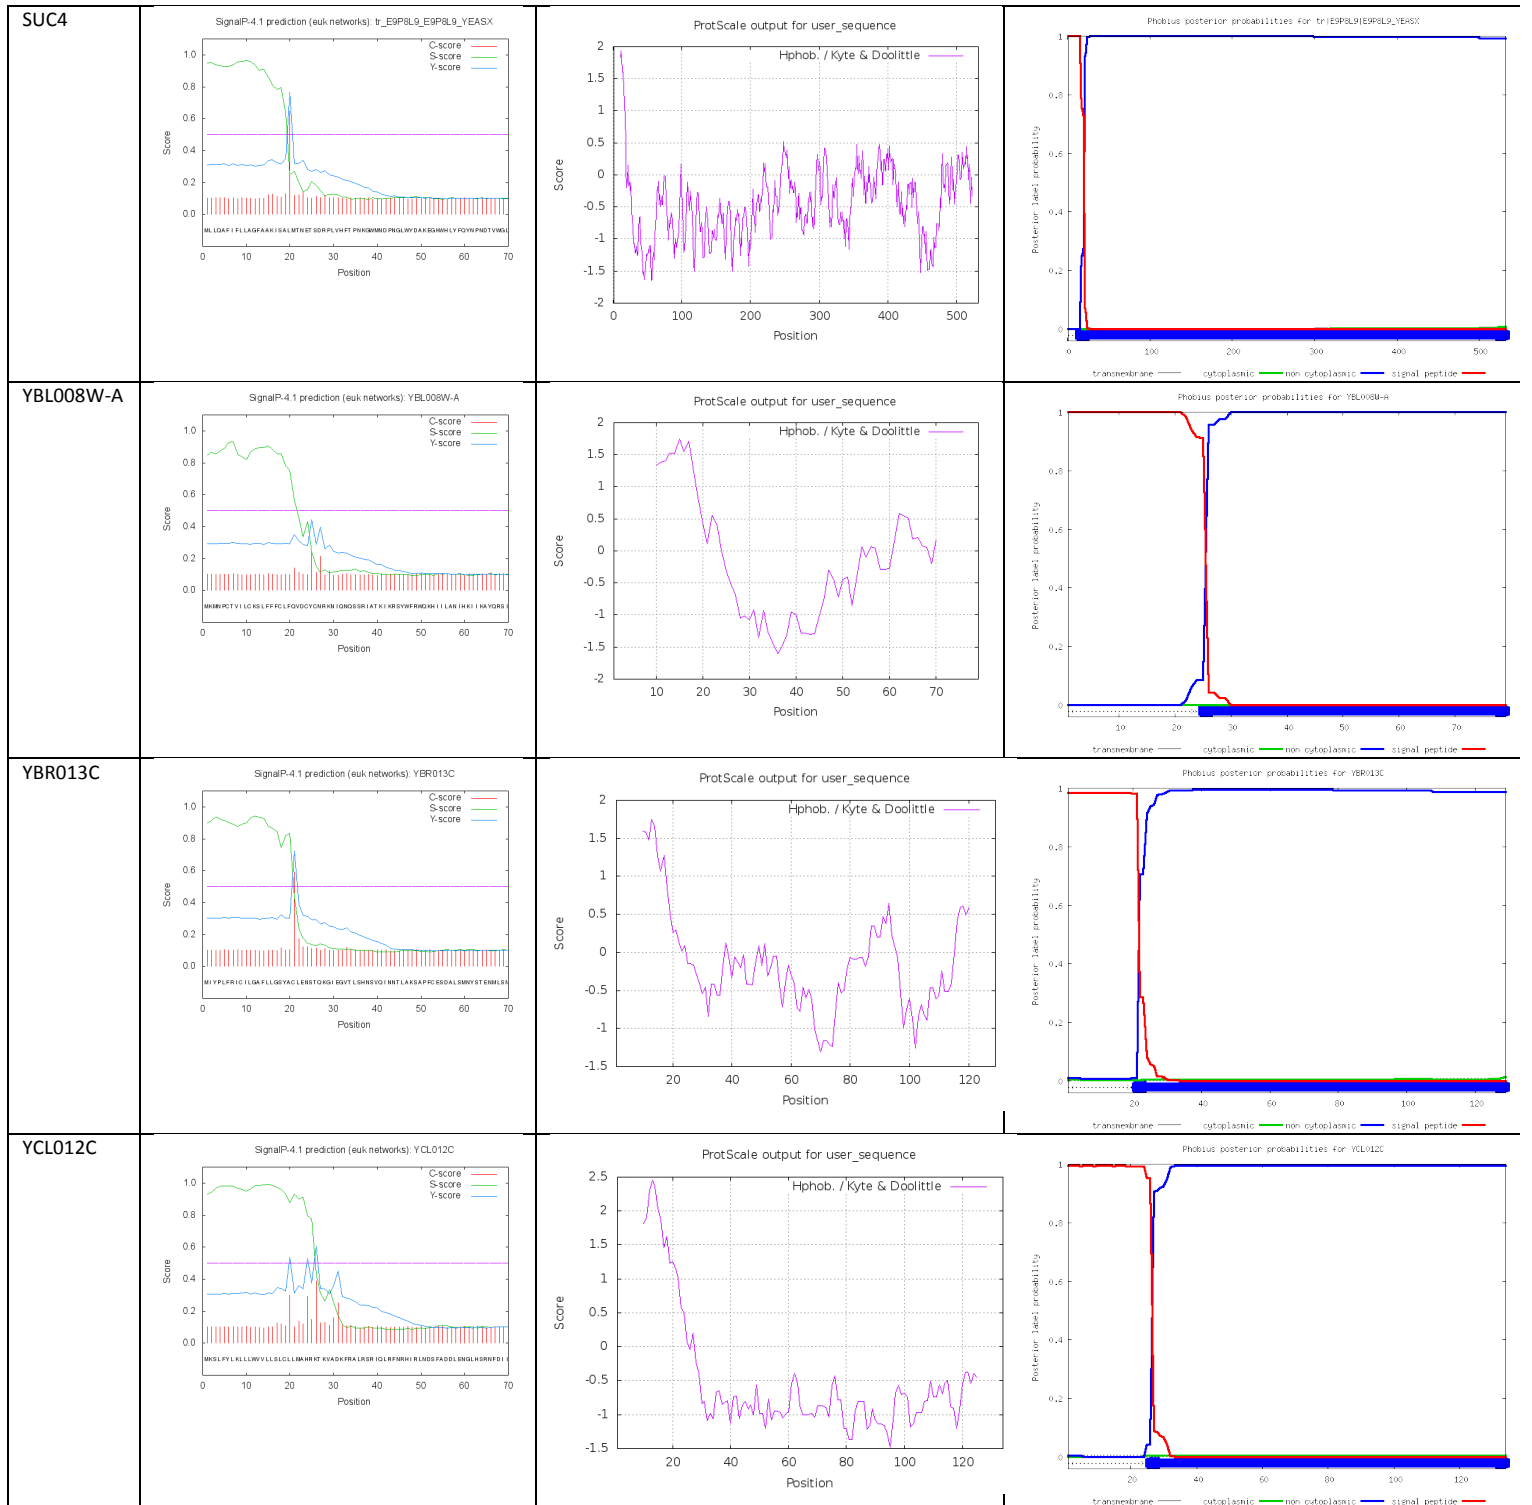

Table S15A. Soluble Proteins Determined by SignalP4.1/Kyte-Doolittle/Phobius

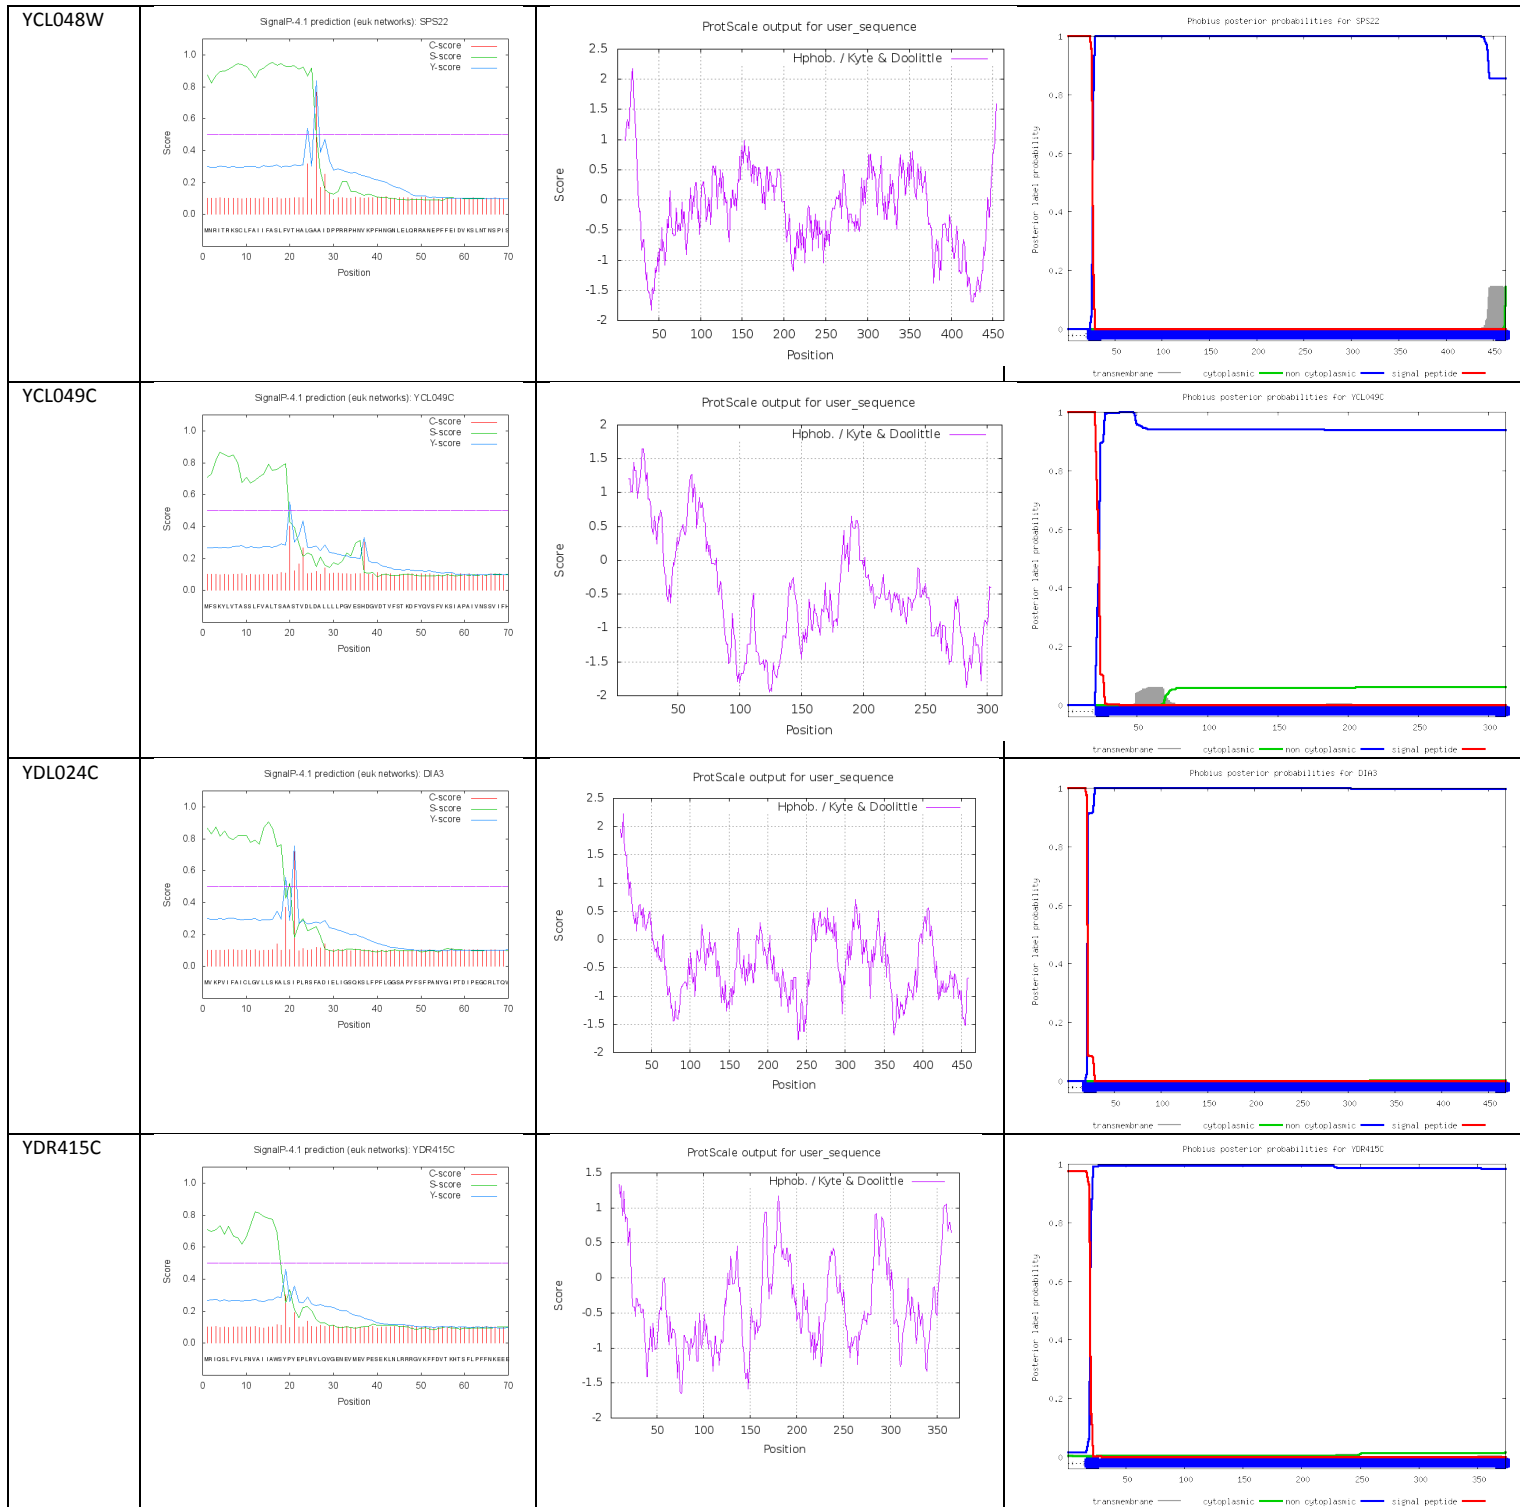

Table S15A. Soluble Proteins Determined by SignalP4.1/Kyte-Doolittle/Phobius

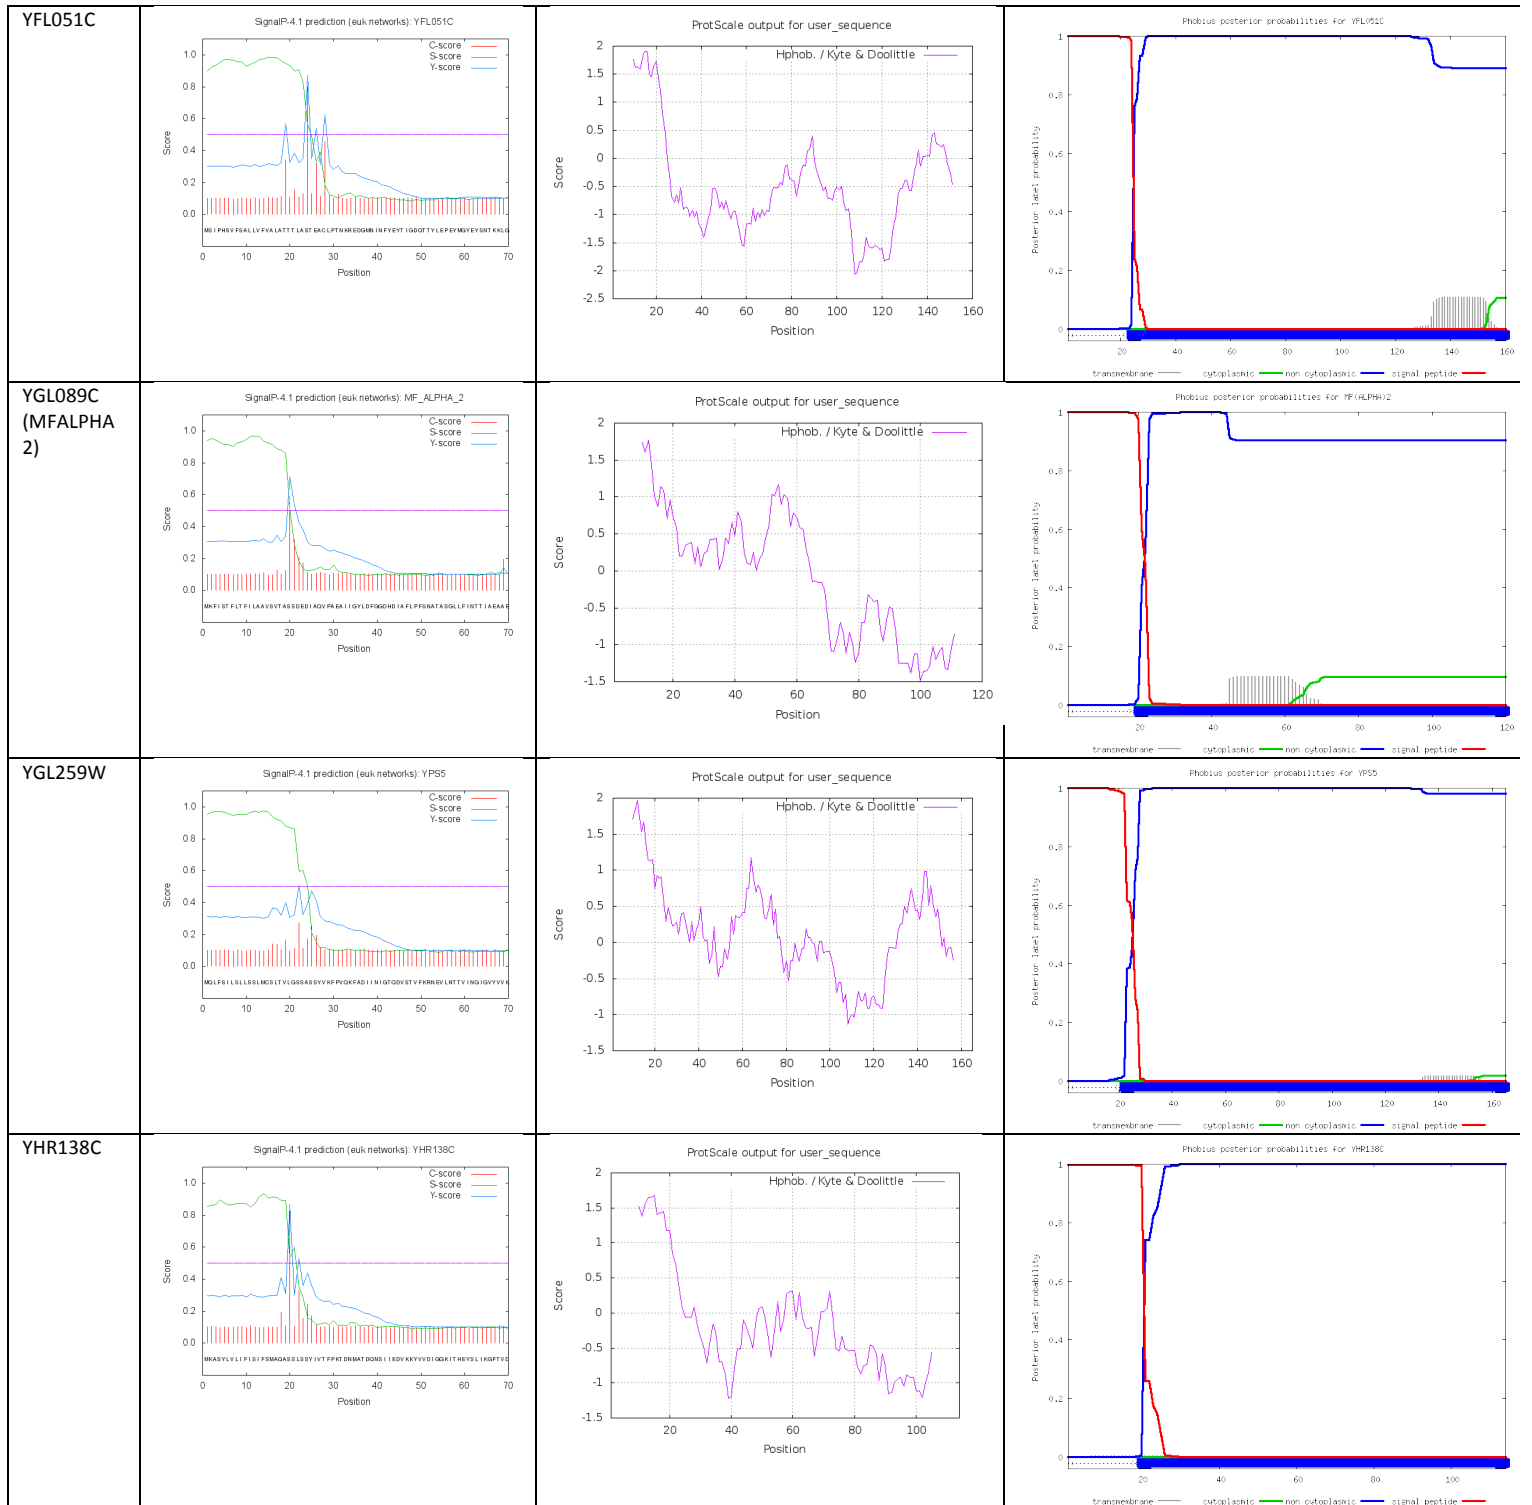

Table S15A. Soluble Proteins Determined by SignalP4.1/Kyte-Doolittle/Phobius

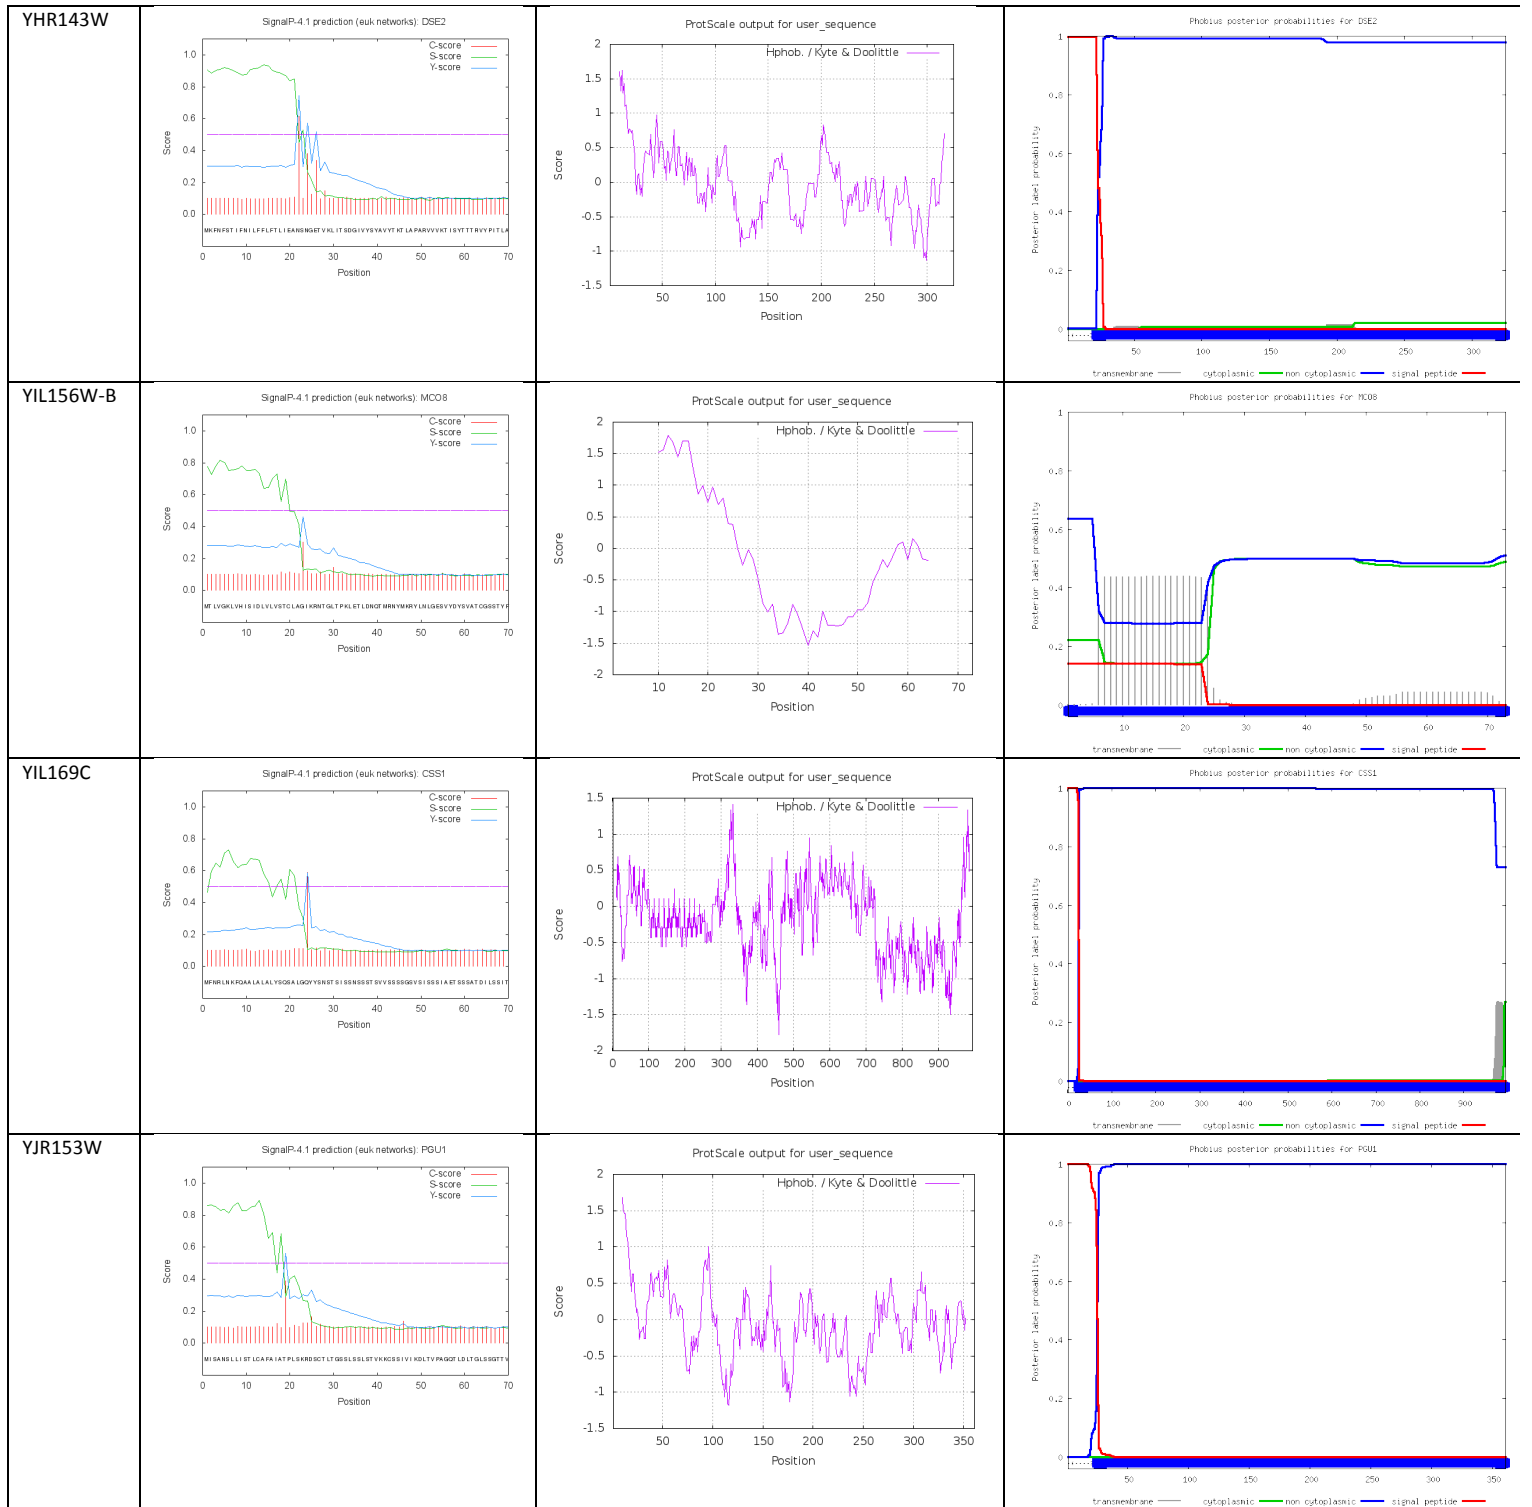

Table S15A. Soluble Proteins Determined by SignalP4.1/Kyte-Doolittle/Phobius

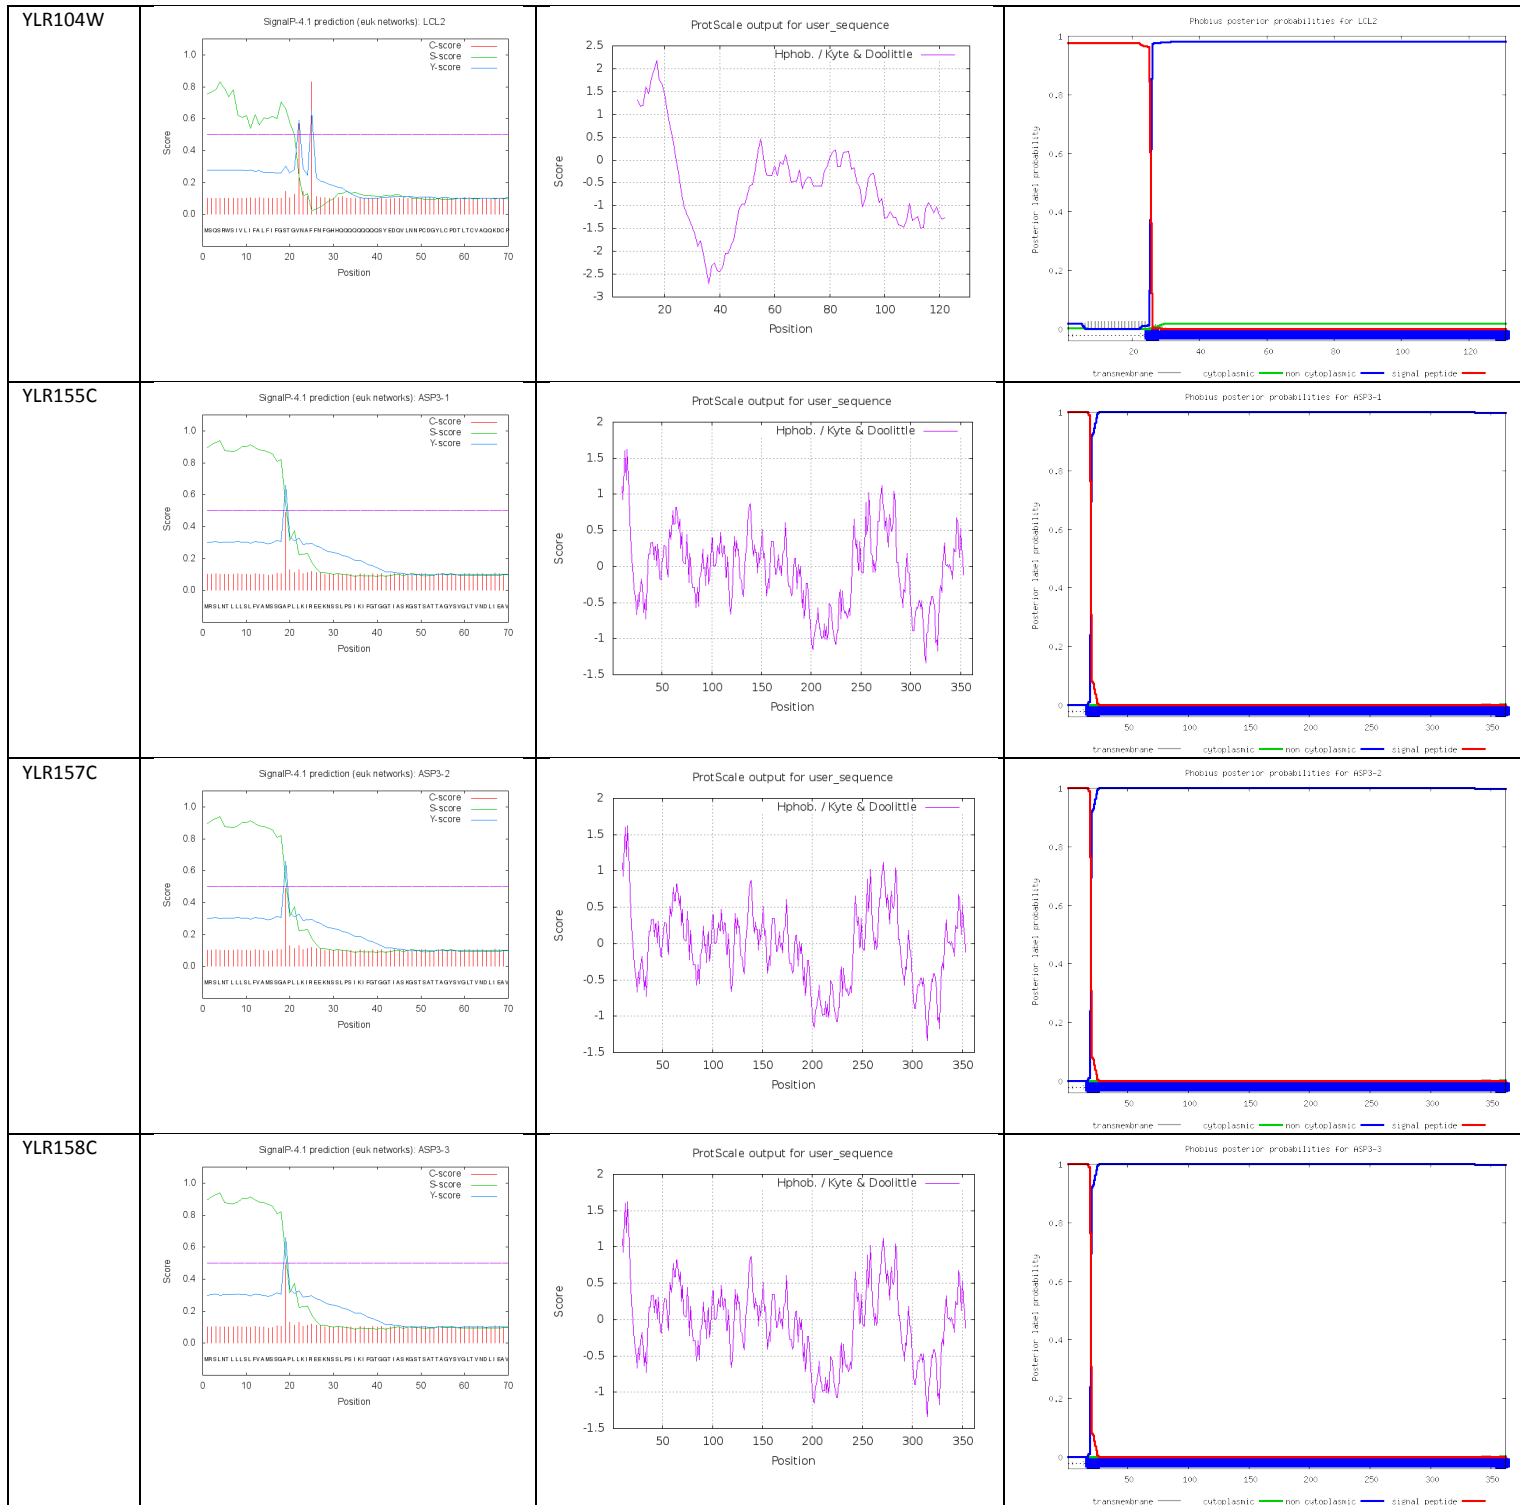

Table S15A. Soluble Proteins Determined by SignalP4.1/Kyte-Doolittle/Phobius

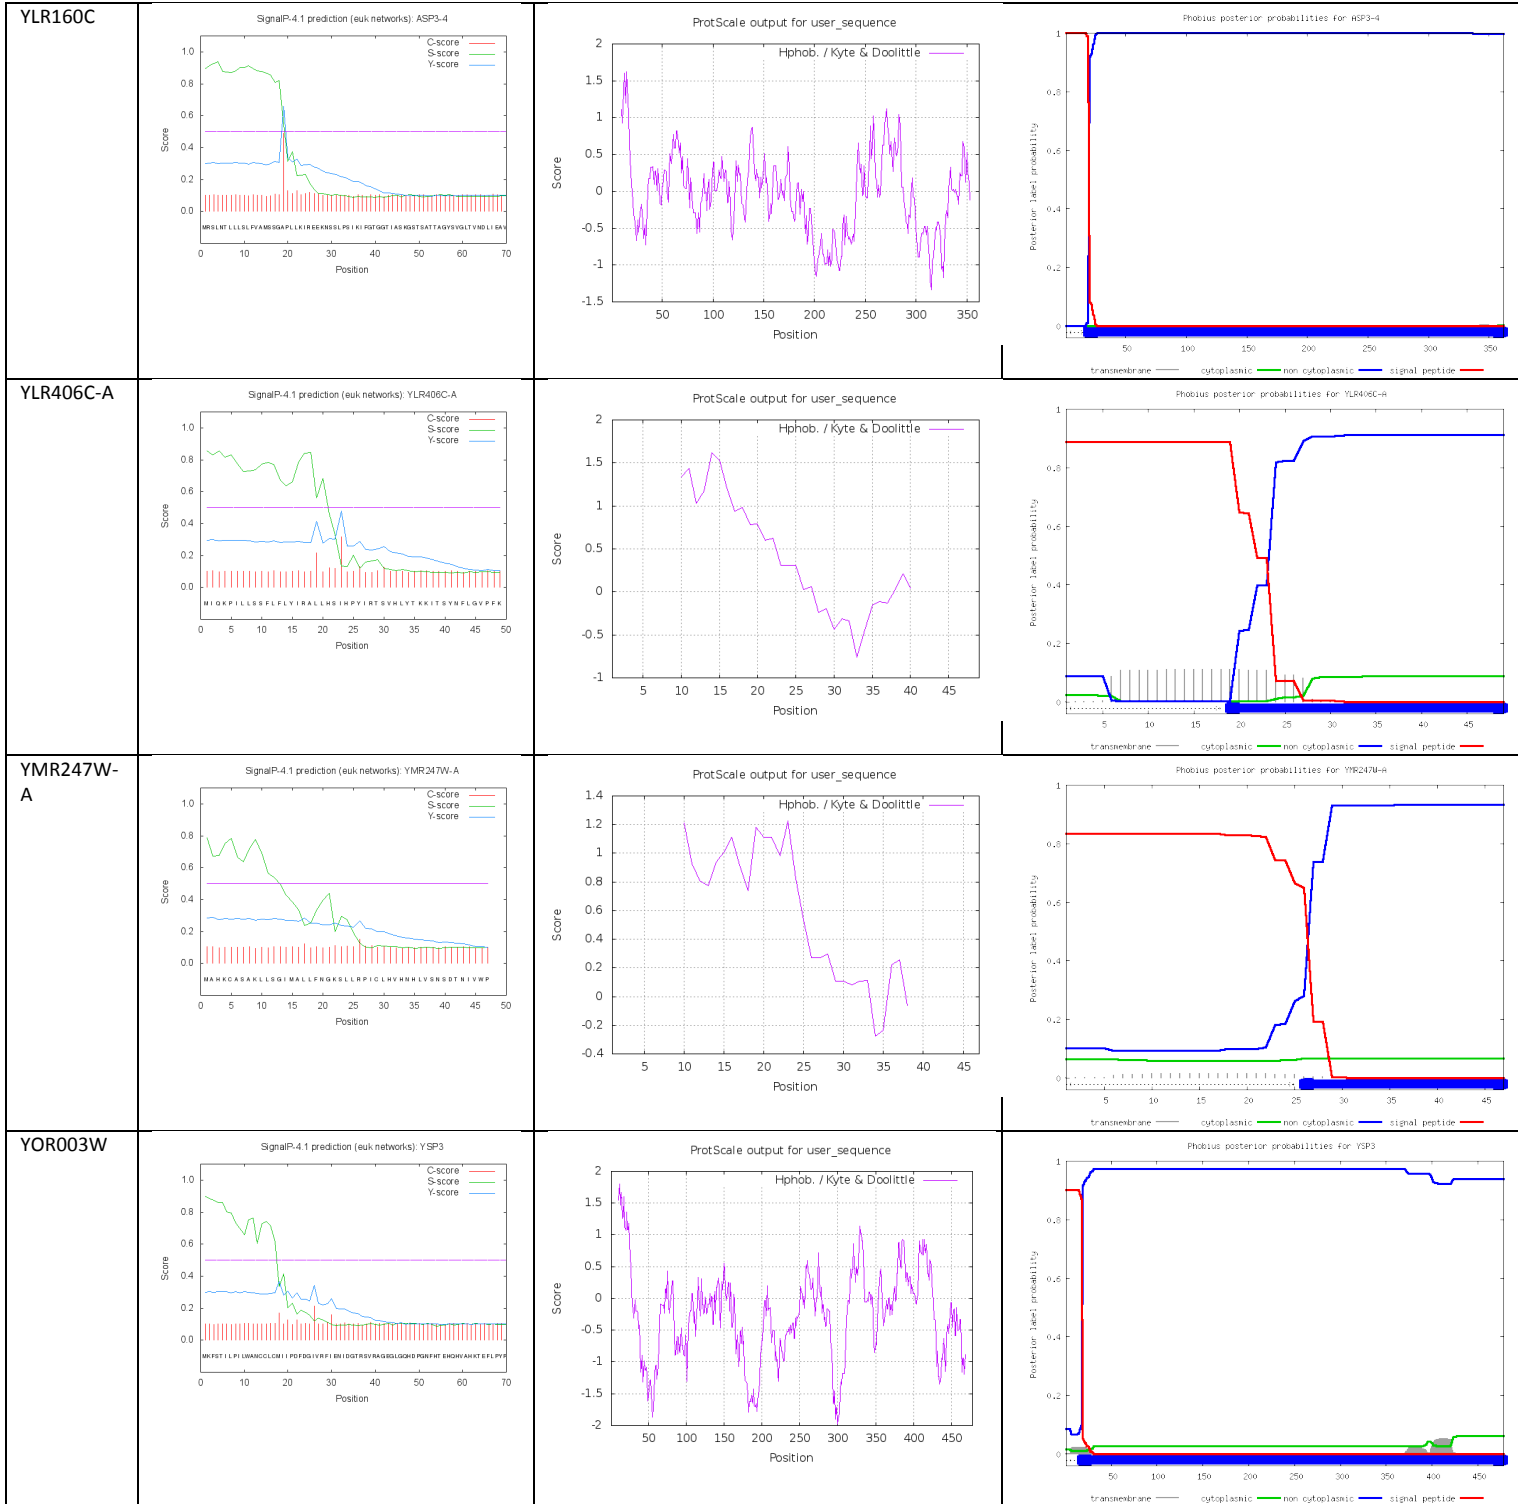



Table S15A. Soluble Proteins Determined by SignalP4.1/Kyte-Doolittle/Phobius

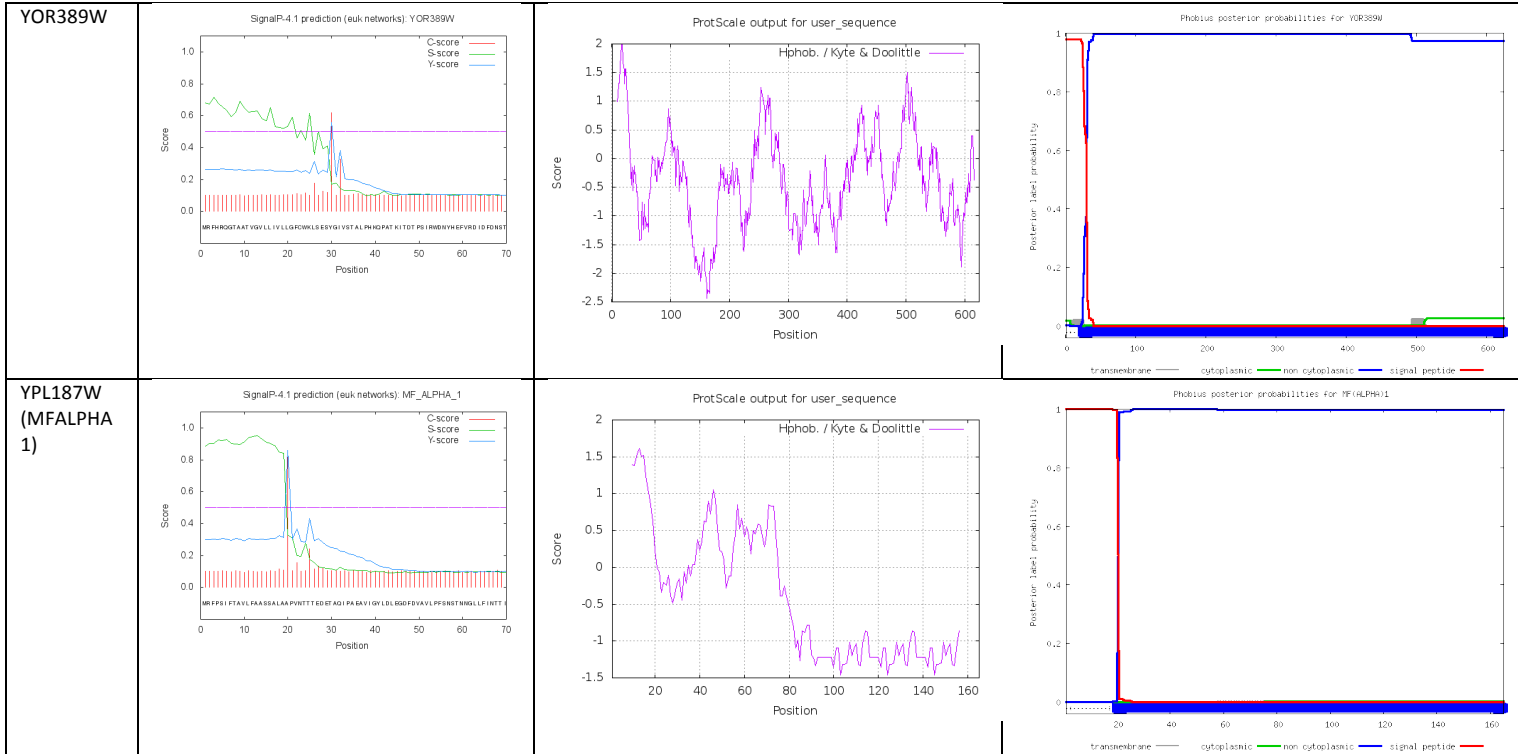

Supplement: Supplementary file [file 392373-6.pdf]
